1 **Title:** Induction of cross-reactive antibody responses against the RBD domain of the  
2 spike protein of SARS-CoV-2 by commensal microbiota

3 **Authors:** Justus Ninnemann<sup>1†</sup>, Lisa Budzinski<sup>1†</sup>, Marina Bondareva<sup>1,2†</sup>, Mario  
4 Witkowski<sup>3,4,5†</sup>, Stefan Angermair<sup>6†</sup>, Jakob Kreye<sup>3,7,8,9,10</sup>, Pawel Durek<sup>1</sup>, S. Momsen  
5 Reincke<sup>3,7,8</sup>, Elisa Sánchez-Sendin<sup>7,8,9</sup>, Selin Yilmaz<sup>1</sup>, Toni Sempert<sup>1</sup>, Gitta Anne  
6 Heinz<sup>1</sup>, Caroline Tizian<sup>3,4,5</sup>, Martin Raftery<sup>11</sup>, Günther Schönrich<sup>11</sup>, Daria  
7 Matyushkina<sup>12</sup>, Ivan V. Smirnov<sup>13</sup>, Vadim M. Govorun<sup>12</sup>, Eva Schrezenmeier<sup>14</sup>,  
8 Thomas Dörner<sup>1,15</sup>, Silvia Zocche<sup>16</sup>, Edoardo Viviano<sup>17</sup>, Katharina Johanna  
9 Sehmsdorf<sup>14</sup>, Hyun-Dong Chang<sup>1,18</sup>, Philipp Enghard<sup>14</sup>, Sascha Treskatsch<sup>6</sup>, Andreas  
10 Radbruch<sup>1</sup>, Andreas Diefenbach<sup>3,4,5</sup>, Harald Prüss<sup>7,8,9</sup>, Mir-Farzin Mashreghi<sup>1,19,20</sup>,  
11 Andrey A. Kruglov<sup>1,2,21\*</sup>

12 **Affiliations:** <sup>1</sup>Deutsches Rheuma-Forschungszentrum (DRFZ), an Institute of the Leibniz Association;  
13 10117, Berlin, Germany.

14 <sup>2</sup>Belozersky Institute of Physico-Chemical Biology and Biological Faculty, M.V. Lomonosov Moscow  
15 State University; 119234, Moscow, Russia.

16 <sup>3</sup>Berlin Institute of Health (BIH); 10178, Berlin, Germany.

17 <sup>4</sup>Laboratory of Innate Immunity, Department of Microbiology and Infection Immunology, Charité-  
18 Universitätsmedizin Berlin; 12203, Berlin, Germany.

19 <sup>5</sup>Mucosal and Developmental Immunology, Deutsches Rheuma-Forschungszentrum, an Institute of the  
20 Leibniz Association; 10117, Berlin, Germany

21 <sup>6</sup>Charité - Universitätsmedizin Berlin, Corporate Member of Freie Universität and Humboldt Universität  
22 zu Berlin, Department of Anesthesiology and Intensive Care Medicine, Charité Campus Benjamin  
23 Franklin; Berlin, Germany

24 <sup>7</sup>German Center for Neurodegenerative Diseases (DZNE) Berlin; 10117, Berlin, Germany

25 <sup>8</sup>Helmholtz Innovation Lab BaoBab (Brain Antibody-omics and B-cell Lab); 10117, Berlin, Germany

26 <sup>9</sup>Department of Neurology and Experimental Neurology, Charité-Universitätsmedizin Berlin, Corporate  
27 Member of Freie Universität Berlin, Humboldt-Universität Berlin, and Berlin Institute of Health; 10117,  
28 Berlin, Germany

29 <sup>10</sup>Department of Pediatric Neurology, Charité-Universitätsmedizin Berlin, Corporate Member of Freie  
30 Universität Berlin, Humboldt-Universität Berlin, and Berlin Institute of Health; 10117, Berlin, Germany

31 <sup>11</sup>Institute of Virology, Charité-Universitätsmedizin Berlin, corporate member of Freie Universität Berlin,  
32 Humboldt-Universität zu Berlin, and Berlin Institute of Health, Berlin, Germany.

33 <sup>12</sup>Federal Research and Clinical Center of Physical-Chemical Medicine of the Federal Medical and  
34 Biological Agency; 119435, Moscow, Russia.

35 <sup>13</sup>Shemyakin-Ovchinnikov Institute of Bioorganic Chemistry, Russian Academy of Sciences; Moscow  
36 117997, Russia

37 <sup>14</sup>Department of Nephrology and Intensive Care Medicine, Charité - Universitätsmedizin Berlin,  
38 corporate member of Freie Universität Berlin, Humboldt-Universität zu Berlin, and Berlin Institute of  
39 Health; 10117, Berlin, Germany.

40 <sup>15</sup>Department of Rheumatology and Clinical Immunology, Charité Universitätsmedizin Berlin, corporate  
41 member of Freie Universität Berlin and Humboldt-Universität zu Berlin, Berlin, Germany.

42 <sup>16</sup>Departments of Pediatric Gastroenterology, Nephrology and Metabolic Diseases, Charité University  
43 Medicine; 10117 Berlin, Germany

44 <sup>17</sup>Charité–Universitätsmedizin Berlin, Corporate Member of Freie Universität Berlin, Humboldt-  
45 Universität zu Berlin and Berlin Institute of Health, Institute of Physiology, Center for Space Medicine  
46 and Extreme Environments Berlin; 10117, Berlin, Germany

47 <sup>18</sup>Institute of Biotechnology, Technische Universität Berlin; Berlin, Germany

48 <sup>19</sup>Department of Pediatric Pulmonology, Immunology and Critical Care Medicine, Charité-  
49 Universitätsmedizin Berlin, corporate member of Freie Universität Berlin and Humboldt- Universität zu  
50 Berlin; 10117 Berlin, Germany

51 <sup>20</sup>Department BIH Center for Regenerative Therapies (BCRT), Charité-Universitätsmedizin Berlin,  
52 corporate member of Freie Universität Berlin and Humboldt-Universität zu Berlin, Campus Virchow-  
53 Klinikum; 13353 Berlin, Germany

54 <sup>21</sup>Center for Precision Genome Editing and Genetic Technologies for Biomedicine, Engelhardt Institute  
55 of Molecular Biology, Russian Academy of Sciences; 119991, Moscow, Russia.

56 †-these authors equally contributed to this work

57 \*correspondence: Dr. Andrey Kruglov e-mail: [kruglov@drfz.de](mailto:kruglov@drfz.de)

58

59 **Abstract:** The commensal microflora is a source for multiple antigens that may induce  
60 cross-reactive antibodies against host proteins and pathogens. However, whether  
61 commensal bacteria can induce cross-reactive antibodies against SARS-CoV-2  
62 remains unknown. Here we report that several commensal bacteria contribute to the  
63 generation of cross-reactive IgA antibodies against the receptor-binding domain (RBD)  
64 of the SARS-CoV-2 Spike protein. We identified SARS-CoV-2 unexposed individuals  
65 with RBD-binding IgA antibodies at their mucosal surfaces. Conversely, neutralising  
66 monoclonal anti-RBD antibodies recognised distinct commensal bacterial species.  
67 Some of these bacteria, such as *Streptococcus salivarius*, induced a cross-reactive  
68 anti-RBD antibodies upon supplementation in mice. Conversely, severely ill COVID-19  
69 patients showed reduction of *Streptococcus* and *Veillonella* in their oropharynx and  
70 feces and a reduction of anti-RBD IgA at mucosal surfaces. Altogether, distinct  
71 microbial species of the human microbiota can induce secretory IgA antibodies cross-  
72 reactive for the RBD of SARS-CoV-2.

73

74 **Main text**

75 SARS-CoV-2 virus infects cells via interaction of the Spike (S) protein with the ACE2  
76 receptor, which is expressed by various cell types [1, 2, 3]. The Spike protein of SARS-  
77 CoV-2 contains a receptor-binding domain (RBD) that mediates its interaction with  
78 ACE2 and viral entry [3, 4]. Blocking of this crucial interaction by monoclonal anti-  
79 SARS-CoV-2-RBD antibodies confers protection of the host against infection of target  
80 cells [5, 6]. Systemically distributed antibodies (mainly IgG, IgM, and IgA1) curtail virus  
81 propagation after productive infection of the host, while the presence of antigen-  
82 specific antibodies secreted at the mucosal surfaces (IgA2, IgA1, and IgM) may  
83 prevent initial infection of the host [7]. The absence of IgA2 antibodies specific for  
84 SARS-CoV-2 antigens in severely diseased COVID-19 patients has also been  
85 demonstrated [8], suggesting that mucosal anti-viral IgA antibodies may protect the  
86 host from a severe course of COVID-19. Several studies have reported the presence  
87 of RBD-binding antibodies in unexposed healthy individuals [9, 10, 11, 12, 13].  
88 Induction of such antibodies by previous infections with common cold coronaviruses  
89 has been postulated, but this link has not been formally proven. The original antigens  
90 inducing cross-reactive RBD-binding secretory IgA antibodies have remained obscure.

91 IgA antibodies at mucosal surfaces are mainly induced by commensal microbiota [14].  
92 It is estimated that the human microbiota contains several millions of genes [15], thus  
93 potentially providing a plethora of epitopes for antibodies [16]. Some of such epitopes  
94 may resemble host proteins, potentially inducing autoimmunity [17, 18, 19, 20, 21],  
95 while others may resemble proteins from other microorganisms and mediate cross-  
96 reactive immunity [17, 22]. Microbiota-induced cross-reactive immunity also provides  
97 protection against microbial infections by *Citrobacter rodentium*, *Clostridiodes difficile*,  
98 *Pseudomonas aeruginosa* [23] and by viruses like influenza [24]. Protection is  
99 mediated by increasing fitness of the innate immune system, e.g. via tonic type I IFN  
100 production [25, 26], and by cross-reactive adaptive antibody responses [23].  
101 Interestingly, cross-reactive antibodies targeting gp41 of HIV-1 are induced by  
102 commensal microbiota [27]. Here we describe the induction of cross-reactive antibody  
103 responses targeting SARS-CoV-2 by distinct members of the oral and gut microbiota.

104 We initially had analysed RBD-specific IgA in the fecal supernatants of age-matched  
105 healthy individuals and severely diseased COVID-19 patients (Table S1). Two out of  
106 12 age-matched healthy donors, previously unexposed to SARS-CoV-2, as confirmed

107 by lack of anti-NP SARS-CoV-2 IgG antibodies in their sera (Fig. S1A), did have fecal  
108 IgA antibodies reactive to RBD (Fig. 1A), 10 out of 21 severely diseased COVID-19  
109 patients had fecal IgA specific for Spike protein RBD of SARS-CoV-2 (Fig. 1B and Fig.  
110 S1B). Considering that age is an important risk factor for the development of severe  
111 COVID-19, we next determined the prevalence of RBD-binding IgA antibodies in young  
112 unexposed individuals (Fig. 1C, D and Table S1). We detected RBD-binding fecal IgA  
113 in approximately 50% of young healthy donors and the magnitude of the RBD-binding  
114 IgA responses in feces negatively correlated with the age of the donors (Fig. 1E). Given  
115 the compositional complexity of fecal supernatant, we next purified IgA antibodies and  
116 tested whether the mucosal RBD-binding IgA can inhibit binding of RBD protein to the  
117 ACE2 receptor, thereby potentially blocking the entry of SARS-CoV-2 into the host  
118 cells. To this end, we expressed human ACE2 on 293T cells, then incubated the ACE2-  
119 expressing cells with biotinylated RBD in the presence of purified mucosal IgA of  
120 various healthy donors (Fig. 1F, S1C). The fraction of bound RBD was analysed by  
121 flow cytometry using fluorescent streptavidin. Purified intestinal IgA from 5 out of 14  
122 healthy donors inhibited RBD binding to ACE2 (Fig. 1F). Of note, complete inhibition  
123 of ACE2-RBD interaction was not achieved even at 1:1 dilution, indicating a rather low  
124 concentration of neutralising anti-RBD IgA in the feces. Also, IgA from some donors  
125 with anti-RBD antibodies did not inhibit the RBD-ACE2 interaction, indicating that  
126 healthy individuals may harbor both inhibitory and non-inhibitory IgA antibodies  
127 directed against the RBD of SARS-CoV-2 (Fig. 1F). Interestingly, healthy donors  
128 exhibited IgA2 antibodies specific for RBD in their feces, while severely diseased  
129 COVID-19 patients lacked fecal anti-RBD IgA2, consistent with a previous report [8]  
130 (Fig. 1G).

131 IgA is induced by microbiota and does bind to microbiota [28]. Thus we next analysed  
132 whether RBD-binding IgA also recognizes commensal microbiota. To this end, we first  
133 divided our healthy cohort (HC) in two groups based on the presence or absence of  
134 RBD-binding IgA in their fecal supernatants: HC RBD-IgA<sup>+</sup> and HC RBD-IgA<sup>-</sup>,  
135 respectively, and quantified the coating of bacteria by endogenous IgA. Both donor  
136 groups exhibited similar coating of their intestinal microbiota by mucosal IgA1 and IgA2  
137 (Fig. 1H). To identify the bacteria binding to mucosal IgA1 and IgA2, we isolated them  
138 by fluorescence-activated cell sorting and determined their taxonomic composition by  
139 16S rRNA sequencing. Linear discriminant (LDA) combined with effect size (LefSE)  
140 analysis revealed distinct taxonomic differences of IgA coated bacteria of RBD-IgA<sup>+</sup>

141 versus RBD-IgA<sup>-</sup> healthy donors. The IgA coated bacterial fraction of RBD IgA<sup>+</sup> donors  
142 were enriched for *Parabacteroides*, *Sporobacter*, *Bilophila*, and *Vagococcus*, while in  
143 RBD-IgA<sup>-</sup> donors the IgA coated fraction was enriched for *Pseudomonas*, *Dorea*,  
144 *Soonwooa*, *Lachnospira*, and *Bacillus* genera (Fig. 1I). These data suggest that  
145 mucosal anti-RBD IgA is associated with recognition of distinct commensal microbiota  
146 by mucosal IgA.

147 To directly test whether anti-RBD antibodies bind to commensal bacteria, we stained  
148 the fecal microbiota of healthy individuals with neutralising anti-RBD antibodies that  
149 had either been generated in immunized rabbits or that had been cloned from  
150 hospitalised COVID-19 patients [29]. The neutralising rabbit antibody showed binding  
151 to a significant fraction of microbiota from HC (Fig. 2A). Furthermore, out of 15  
152 monoclonal neutralising antibodies derived from hospitalized COVID-19 patients (for  
153 the details see [29]) only two (HK CV07-287, HL CV07-250) showed no microbiota  
154 binding activity (Fig. 2B, C). The remaining antibodies recognised commensal bacteria,  
155 9 of them also independently of pre-existing fecal anti-RBD IgA (Fig. 2B, C). Of note,  
156 two clonally related antibodies, CV07-200 and CV07-283, showed distinct binding  
157 patterns (Fig. 2C and Fig. S2). Co-staining of microbiota with rabbit and human  
158 monoclonal antibodies showed that both recognize similar as well as distinct fecal  
159 bacteria communities (Fig. S3). Thus, most neutralising human anti-RBD SARS-CoV-  
160 2 antibodies tested in our study bind to distinct commensal bacteria.

161 To identify the bacteria recognized by neutralising anti-RBD antibodies, we stained,  
162 sorted and sequenced antibody-bound fecal bacteria from 3 healthy donors using 4  
163 different anti-RBD antibodies (Fig. 2D, E). Several genera with an abundance of more  
164 than 1% were bound by the respective antibodies, and the identified bacteria differed  
165 among various donors (Fig. 2E), highlighting the inter-individual diversity in the  
166 bacterial composition. The binding of the anti-RBD IgG antibodies to microbiota was  
167 specific, since neither the secondary anti-IgG antibodies used to identify their binding  
168 (Fig.2), nor human IgG antibody with different specificity showed similar binding  
169 patterns towards microbiota (Fig. S3B). The monoclonal human anti-RBD antibodies  
170 in particular showed reactivity towards *Bacteroides*. Some of them also recognised  
171 *Clostridia* species, *Streptococci*, *Escherichia* and *Bifidobacteria* (Fig. 2E). Of the  
172 genera bound by IgA of HC RBD-IgA<sup>+</sup> donors, *Parabacteroides* and *Bilophila* also  
173 bound to the human anti-RBD IgG antibodies (Fig. 1I, 2E).

174 By fluorescence-activated cell sorting we isolated bacteria recognised by the human  
175 anti-RBD IgG antibodies from 8 healthy donors, and cultured them using selective  
176 bacterial media and anaerobic culture conditions. Individual bacterial colonies were  
177 further expanded and their identity determined by 16S rRNA Sanger sequencing (Fig.  
178 2F). Two *Bacilli* species, three *Streptococcus* species, two *Bifidobacterium* species,  
179 two *Enterococcus* species, *Veillonella parvula* and *Acidaminococcus intestinalis* were  
180 identified as bacteria bound by anti-RBD antibodies (Fig. 2F). Restaining of purified  
181 cultures confirmed their recognition by anti-RBD antibodies (Fig. S4A, B). One of the  
182 isolated bacterial species was *Streptococcus salivarius*, bacteria living in the  
183 oropharynx, with probiotic activity. Indeed, *S. salivarius* K12, an established probiotic  
184 strain, is recognized by rabbit anti-RBD antibodies (Fig. S4A). Of note, some bacterial  
185 cultures showed only partial staining with anti-RBD antibodies, probably reflecting the  
186 heterogeneity of bacteria during growth or community-dependent surface variability.  
187 Since the main route of infection with SARS-CoV-2 is via the respiratory tract, we  
188 analysed the reactivity of salivary IgA against the oropharyngeal bacteria *S. salivarius*  
189 *K12*, *B. pseudocatenulatum* and *B. subtilis*. Saliva from HC RBD-IgA<sup>+</sup> donors  
190 contained significant levels of IgA1 and IgA2 binding to *S. salivarius* and *B.*  
191 *pseudocatenulatum* (Fig. S4C). Western blot analysis of bacterial lysates revealed that  
192 rabbit anti-RBD antibody and the human anti-RBD IgG antibody HL CV07-200  
193 recognise discrete proteins of *S. salivarius* and *B. pseudocatenulatum* which were  
194 further identified by mass-spectrometry (Fig. S5A-E). Subsequent cloning and  
195 overexpression in *E. coli* showed binding of anti-RBD antibody to “uncharacterised  
196 protein RSSL-01370” of *S. salivarius* *K12* (Fig. S5B). These data demonstrate that  
197 commensal microbiota express distinct protein antigens that are recognized by some,  
198 but not all, neutralising anti-RBD antibodies.

199 Having shown that anti-RBD antibodies can cross-react with bacterial proteins, we  
200 tested whether the bacteria expressing these proteins can induce a cross-reactive anti-  
201 RBD antibody response. We immunised C57Bl/6 mice intraperitoneally once with heat-  
202 killed bacteria and analysed the antibody responses against RBD 14 days later. Mice  
203 immunized with heat-killed *S. salivarius*, but not those immunized with heat-killed *B.*  
204 *pseudocatenulatum*, developed anti-RBD IgG antibodies in their sera (Fig. 3A).  
205 *Veillonella parvulla* also induced anti-RBD IgG upon immunization (Fig. 3B). Sera from  
206 mice immunised with *S. salivarius* and *V. parvulla* could inhibit the binding of RBD to  
207 ACE2, as expressed in 293 T cells (Fig. 3C). Closer to the physiological situation, the

208 natural route of confrontation with bacteria of oropharyngeal microbiota, oral feeding  
209 with *S. salivarius* K12 and *B. pseudocatenuatum*, induced fecal IgA specific for RBD  
210 in C57Bl/6 mice (Fig. 3D). Moreover, fecal supernatants from animals supplemented  
211 with bacteria inhibited binding of RBD to ACE2 (Fig. 3E). To gain further insight on the  
212 specificity of antibodies induced by oral supplementation with bacteria, we next  
213 performed epitope mapping of the IgA induced in the gut against 564 peptides derived  
214 from the Spike protein of SARS-CoV-2. We observed that both *B. pseudocatenuatum*  
215 and *S. salivarius* induced antibodies bound to the peptide sequence  
216 GFNCYFPLQSYGFQPTNGV (Fig. 3F, Fig. S6), that corresponds to the receptor  
217 binding motif (RBM) of RBD, in line with ACE2 inhibition data. Also, the peptide  
218 recognition pattern of rabbit anti-RBD and HL CV07-200 antibodies overlapped: both  
219 antibodies had in their epitopes a similar sequences within the RBM motif (Fig. S6).  
220 These data show that oral supplementation with *S. salivarius* K12 and *B.*  
221 *pseudocatenuatum* can induce antibodies cross-reactive against the RBM motif of the  
222 spike protein of SARS-CoV-2.

223 In light of the ability of distinct oropharyngeal microbiota species to generate mucosal  
224 IgA cross-reactive to SARS-CoV-2, we compared the oral microbiota composition of  
225 healthy donors to that of COVID-19 patients, as well as of patients with flu-like  
226 symptoms, but negative for SARS-CoV-2 (Fig. 4 and Table S2). A principal component  
227 analysis (PCA) indicated that the oral microbiota of hospitalized COVID-19 patients  
228 differed considerably from healthy donors, patients with mild COVID-19 and patients  
229 with flu-like symptoms (Fig. 4A). First of all, the oral microbiota from severely diseased  
230 COVID-19 patients was characterized by an overall decreased bacterial diversity (Fig.  
231 4B). A subsequent LefSE analysis revealed multiple bacterial genera enriched in  
232 severe COVID-19 patients (Fig. 4C). Conversely, *Veillonella* and *Streptococcus*  
233 genera, but not *Bifidobacteria* genera, which we had identified as potential inducers of  
234 cross-reactive antibodies, were significantly reduced in patients with severe COVID-  
235 19 (Fig. 4C, D). Instead, these patients showed an increased abundance of the genera  
236 *Enterococcus*, *Staphylococcus* and *Escherichia/Shigella* in their oropharynx (Fig. 4C,  
237 D). This is not due to the treatment of severe COVID-19 patients with antibiotics (Abx),  
238 since our cohort includes both Abx naive and Abx-treated patients, and both groups  
239 showed the same prevalence of microbiota composition.

240 The differences in the oral microbiota composition also extend to the intestinal  
241 microbiota in severely affected COVID-19 patients (Fig. S7A and Table S3). Also



242 intestinal microbiota from severe COVID-19 patients displayed reduced bacterial  
243 diversity (Fig. S7B) with dominance of opportunistic pathogenic bacteria, such as  
244 *Enterococcus*, *Staphylococcus* and *Vagococcus* (Fig. S7C, D). *Streptococcus* genera  
245 were significantly diminished in severe COVID-19 patients (Fig. S7C, D), while the  
246 differences in *Bifidobacteria* genera were not significant. Thus, severe COVID-19 is  
247 associated with the outgrowth of opportunistic bacteria (*Enterococci*, *Staphylococci*),  
248 while other genera, like *Streptococcus* and *Veillonella* are depleted from the mucosal  
249 surfaces, both oral and intestinal.

250 SARS-CoV-2 infection of human mucosal surfaces induces an inflammatory syndrome  
251 that may progress towards fatal disease. Multiple factors, both host-intrinsic and host-  
252 extrinsic, were uncovered as drivers of disease progression. Host-derived risk factors  
253 include presence of autoantibodies against type I IFN, genetic predisposition [30, 31]  
254 and preexisting disease conditions, such as diabetes, obesity, and ageing [32].  
255 Furthermore, while pre-existing memory T cells specific for SARS-CoV-2 may be  
256 protective, pre-existing low avidity memory T cells recognising SARS-CoV-2 antigens  
257 in the elderly may be a potential risk factor during COVID-19 [8, 33]. Here we report  
258 that healthy, unexposed individuals can have preexisting secretory IgA antibodies at  
259 mucosal surfaces, antibodies which also bind to the RBD of the S protein of SARS-  
260 CoV-2, and thus have the potential to neutralise the virus and prevent or ameliorate  
261 infection and COVID-19. This pre-existing mucosal immunity fades with age.

262 Microbiota may contribute to the protection of the host from infection via modulating  
263 the ACE2 receptor expression [34], induction of tonic type I IFN responses [35], and  
264 via tuning systemic and mucosal TGF- $\beta$ 1 levels, with TGF-  $\beta$ 1 being the inducer of  
265 antibody class switch recombination to IgA [8, 36]. Here we have identified bacteria of  
266 the oropharyngeal microbiota that express protein antigens on their cell surface, which  
267 mimic epitopes of the RBD of the SARS-CoV-2 Spike protein, to an extent that they  
268 not only are recognised by anti-RBD antibodies of different origin but can themselves  
269 also trigger an antibody response capable of neutralising RBD in mice *in vivo*, both by  
270 intraperitoneal immunization and by oral feeding. Presence of these bacteria is  
271 associated with mucosal IgA antibodies recognizing RBD, and are capable of inhibiting  
272 its binding to ACE2, in healthy donors not previously exposed to SARS-CoV-2. It  
273 remains a challenge for future research, to determine how the bacteria induce such  
274 antibodies. Similar observations have been reported for the HIV-1 virus [27, 37, 38].  
275 In particular, a link between gp-41 and gp-120 reactive antibodies and their cross-

276 reactivity against microbiota has been demonstrated [27, 37]. It is evident that bacteria  
277 of the microbiota provide a rich target proteome for the mucosal immune system, and  
278 that this can result in the generation of a cross-reactive, pre-existing mucosal immunity  
279 against distinct viruses and may explain heterogeneity of human subjects in  
280 susceptibility towards viral infection.

281 Apart from host-intrinsic factors, the initial virus load may affect disease outcome and  
282 severity [39, 40], and there is an increasing evidence of microbiota changes during  
283 severe COVID-19 [41, 42], suggesting that the microbiota composition may be a risk  
284 factor for the development of severe disease as well [41, 42, 43]. The data are  
285 conflicting in terms of the genera associated with disease severity, which is probably  
286 due to the heterogeneity of patient cohorts and differences in treatment. A common  
287 denominator is that acute COVID-19 is associated with the prevalence of opportunistic  
288 bacteria and depletion of immunomodulatory bacteria [42]. The present study, showing  
289 an increase in *Enterococci*, *Staphylococci*, and *Vagococci*, and depletion of *Veillonella*  
290 and *Streptococci* species in severe COVID-19 patients, is in line with this notion. But  
291 whether these changes are cause or consequence of SARS-CoV-2 infection has  
292 remained unclear.

293 On one hand, our data show that microbiota can be recognised by the antibodies raised  
294 against the RBD domain of the SARS-CoV-2 spike protein. Such antibodies  
295 presumably also shape the microbiota composition. Further studies analysing the  
296 impact of antibody responses induced by virus infection and vaccination induced on  
297 the microbiota composition are needed to address this fundamental question. On the  
298 other hand, immunocompromised patients and patients using immunosuppressive  
299 drugs respond poorly to the vaccination [44]. Data presented here propose that  
300 bacteria supplementation, in particular with *S. Salivarius K12*, may enhance the titers  
301 of anti-RBD IgA antibodies at the mucosal surfaces, prophylactically or therapeutically,  
302 or even in the context of vaccination.

303 The data presented here propose that bacterial supplementation either  
304 prophylactically, therapeutically, or in the context of vaccination, and particularly with  
305 *S. Salivarius K12*, may enhance the titers of anti-RBD IgA antibodies at the mucosal  
306 surfaces.

307

## 308 **Limitations of the study**

309 Despite of the identification of various bacteria that can induce cross-reactive immune  
310 responses against the RBD domain of the SARS-CoV-2 Spike protein, it remains to be  
311 determined whether induction of such antibodies in humans may protect from SARS-  
312 CoV-2 infection or severe course of COVID-19. Further, the size of the cohorts used  
313 in this study, both healthy and COVID-19 patients included in the study does not allow  
314 for a detailed correlation analysis of microbiota-induced anti-RBD antibody responses  
315 with the outcome of COVID-19.

316

## 317 **Materials and Methods**

### 318 **Human Donors**

319 The recruitment of study subjects was conducted in accordance with the Ethics  
320 Committee of the Charité (EA 1/144/13 with EA 1/075/19, EA 2/066/20) and was in  
321 compliance with the Declaration of Helsinki.

322

### 323 **Stool sample preparation**

324 Fresh stool samples of patients and healthy controls were stored on ice or at 4°C  
325 before processing within 48 h. The stool was diluted in autoclaved and sterile-filtered  
326 PBS (in-house, Steritop® Millipore Express®PLUS 0.22 µm, Cat. No: 2GPT05RE)  
327 according to weight in the ratio 100 µg/mL and homogenized by vortex and spatula.  
328 The feces solution was then subsequently filtered through 70 µm (Falcon, Cat. No.  
329 352350) and 30 µm filters (CellTrics®, Sysmex, Cat. No. 04-0042-2316) and  
330 centrifuged at 4000 x g to pellet the bacterial cells. The supernatant of this  
331 centrifugation step was once more centrifuged at 13,000 x g to pellet residual cells.  
332 The cell free supernatant was filtered through a 0.22 µm syringe top (Filtropur, Sarstedt  
333 Cat. No. 83.1826.001) filter and stored at – 80°C until further use. Pellets of both  
334 centrifugation steps were pooled and re-suspended in 10 mL PBS to measure the cell  
335 density at 600 nm. For each working stock a cell amount resembling 0.4 OD was stored  
336 in 1 mL of a 40 % glycerol in LB medium mixture in Safe Seal 2 mL reaction tubes  
337 (Sarstedt, Cat. No. 72.695.500) and transferred to – 80°C.

338

### 339 **Swabs sample preparation**

340 Swabs were prepared for 16 S rRNA sequencing with an adapted protocol of the Quick-  
341 DNA™ Fecal/Soil Microbe Miniprep Kit (Zymo Research, Cat. No. D6010). Swabs  
342 were obtained from clinics on – 80 °C and kept frozen until further use. The swab stick  
343 was either already stored in buffer or Bead Bashing™ buffer was added to cover the  
344 swab brush. Up to 750 µL of the buffer solutions were transferred to a BashingBead™  
345 Lysis Tube and rigorously mixed at 13,000 rpm at 37 °C. Following the kits protocol  
346 the supernatant was harvested after centrifugation at 13,000 x g for 5 min and once  
347 more filtered by an Zymo-Spin™ III-F Filter. The DNA containing solution was then  
348 treated with Genomic Lysis Buffer and the containing DNA was put on a DNA binding  
349 Zymo-Spin™ IICR Column repeatedly until the entire sample volume was loaded. The  
350 bound DNA was washed with DNA Pre-Wash Buffer and g-DNA Wash Buffer. The  
351 washed DNA was eluted in 50 µL DNA Elution buffer and once more further purified  
352 by filtration through the Zymo-Spin™ III-HRC Filter. 2.5 µL of each of the prepared  
353 samples was directly loaded to the amplicon PCR of the Illumina Nextera NGS protocol  
354 described in the 16 s rRNA method section.

355

### 356 **16S rRNA gene sequencing**

357 For 16 S rRNA gene sequencing, we amplified the V3/V4 region directly from the  
358 sorted samples (primer sequences: 5'-  
359 TCgTCggCAgCgTCAGATgTgTATAAgAgACAgCCTACgggNggCWgCAg-3' and 5'-  
360 gTCTCgTgggCTCggAgATgTgTATAAgAgACAaggACTACHVgggTATCTAATCC-3')  
361 with a prolonged initial heating step as described by "16S Metagenomic Sequencing  
362 Library Preparation" for the Illumina MiSeq System. After the amplicon the genomic  
363 DNA was removed by AmPure XP Beads (Beckman Coulter Life Science Cat. No.  
364 A63881) with a 1:1.25 ratio of sample to beads (v/v). Next the amplicons were  
365 checked for their size and purity on a 1.5 % agarose gel and if suitable subjected to  
366 the index PCR using the Nextera XT Index Kit v2 Set C/D (Illumina, FC-131-2003).  
367 After index PCR the samples were cleaned again with AmPure XP Beads (Beckman  
368 Coulter Life Science Cat. No. A63881) in a 1: 0.8 ratio of sample to beads (v/v).  
369 Samples were then analyzed by capillary gel electrophoresis (Agilent Fragment  
370 Analyzer 5200) for correct size and purity with the NGS standard sensitivity fragment

371 analysis kit (Agilent Cat. No. DF-473). Of all suitable samples a pool of 2 nM was  
372 generated and loaded to the Illumina MySeq 2500 system.

373 Raw data were processed and de-multiplexed using MiSeq Reporter Software.  
374 Forward and reverse reads were combined using PANDAseq 2.11 with a minimum  
375 overlap of 25 bases (PMID:22333067) and classified using “classifier.jar” 2.13 from the  
376 Ribosomal Database Project with a confidence cutoff of 50% (PMID: 24288368,  
377 PMID: 17586664). The copy number adjusted counts were agglomerated to bacterial  
378 genera, rarefied to the smallest size and alpha diversity were estimated using  
379 phyloSeq 1.34 (PMID: 23630581). Principle coordinate analysis were performed using  
380 Bray–Curtis dissimilarity distance using vegan 2.5-7[45].

381 The linear discriminant analysis were performed using LEfSe, based on copy number  
382 adjusted counts normalized to 1M reads [46]. Raw sequence data were deposited at  
383 the NCBI Sequence Read Archive (SRA) under the accession number PRJNA738291.

384

### 385 **Microbiota staining**

386 The frozen microbiota stocks were topped up with 1 mL of autoclaved and sterile-  
387 filtered PBS to reduce glycerol toxicity while thawing. Samples were centrifuged at  
388 13,000 xg for 10 min twice, the supernatant removed and the pellets re-suspended in  
389 PBS and finally divided into 10 tests. All the stainings of microbiota samples were  
390 performed in a DNase containing buffer (PBS/ 0.2 % BSA/25 µg/µL DNase, Sigma  
391 Aldrich Cat. No. 10104159001). Staining for human immunoglobulins was performed  
392 in 100 µL with 1:50 (v/v) of the detection antibodies: anti-human IgM Brilliant Violet 650  
393 (clone: MHM-88, Biolegend® Cat. No. 314526), anti-human IgG PE/ Dazzle™  
394 594(clone: HP6017, Biolegend® Cat. No. 409324), anti-human IgA1 Alexa Fluor 647  
395 (clone: B3506B4, Southern Biotech Cat. No. 9130-31), anti-human IgA2 Alexa Fluor  
396 488 (clone: A9604D2, Southern Biotech Cat. No. 9140-30). The samples were  
397 incubated for 30 minutes at 4 ° C and directly topped up with 1 mL of a 5 µM Hoechst  
398 33342 solution (Thermo Fischer Scientific Cat. No. 62249) for another 30 min at 4 °C.  
399 For the detection of Spike protein- similar structures the samples were first incubated  
400 in 50 µL containing 0.5 µg SARS-CoV-2 Spike Neutralizing Antibody (clone:  
401 HA14JL2302, Sino Biological Inc. Cat. No: 40592-R001) or Neutralizing Antibody  
402 isolated from COVID-19 patients for 15 min at 4 °C then washed with PBS and stained

403 again in 50  $\mu$ L of the anti-Rabbit Alexa 647 (7,5 $\mu$ g/ml, Jackson ImmunoResearch Cat.  
404 No. 111-606-144) or anti-human IgG PE/ Dazzle™ 594 (2 $\mu$ g/ml) which was then  
405 topped up with 5  $\mu$ M Hoechst 33342 solution. After Hoechst 33342 staining samples  
406 were washed with PBS and centrifuged at 13,000 x g for 5 min. After removal of  
407 supernatant, the samples were re-suspended in PBS/ 0.2 % BSA. The samples were  
408 transferred to 5 mL round bottom tubes (Falcon, Cat. No. 352063) for acquisition.

409

## 410 **Microbiota Flow Cytometry**

411 We used a BD Influx® cell sorter for all cytometric investigations of the microbiota  
412 samples. The sheath buffer (PBS) for the instrument was autoclaved and sterile filtered  
413 (Steritop® Millipore Express®PLUS 0.22  $\mu$ m, Cat. No: 2GPT05RE) before each  
414 fluidics start up. The quality of each acquisition was assured by the alignment of lasers,  
415 laser delays and laser intensities by Sphero™ Rainbow Particles (BD Biosciences Cat.  
416 No. 559123). For sorting, the drop delay was determined prior with Accudrop Beads  
417 (BD Biosciences Cat. No. 345249). Samples were acquired with an event rate below  
418 15,000 events and sorted with an event rate below 10,000 events. We always recorded  
419 300,000 Hoechst 33342 positive events. We sorted up to 100,000 events for  
420 sequencing directly into Protein Low Bind tubes (Eppendorf Cat. No 022431102), spun  
421 down the sample at 17,000 x g and replaced residual sorting buffer by DEPC treated  
422 water (Invitrogen Cat. No. 46-2224). The samples were stored in approx. 10  $\mu$ L at -20  
423 °C until further processing. For subsequent cultivation of bacteria, we sorted directly  
424 into PYG medium and transferred the cells directly into a COY anaerobic chamber.

425

## 426 **Bacteria culture**

427 PYG medium and plates were prepared as described by the DSMZ (German Collection  
428 of Microorganisms and Cell Cultures). 300,000 events were sorted into 1 ml of PYG  
429 medium and directly transferred to a COY anaerobic chamber. Sorted bacteria were  
430 plated on PYG, BHI (Brain heart infusion broth, Sigma, Cat. No. 53286-100G) and  
431 Fastidious agar plates (Thermo Scientific, Cat. No. 12957138) and bacteria were  
432 grown for 24 hours. Colonies were picked and PYG medium, BHI broth and Schaedler  
433 broth (Roth, Cat. No. 5772.1) were inoculated with colonies from the respective plates.

434 The next day, DNA was isolated and the remaining bacteria were frozen in 40%  
435 glycerol LB medium in liquid nitrogen or – 80 °C.

436

### 437 **Sequencing from bacterial colonies**

438 For the identification of the bacterial species bound to the neutralizing anti-RBD  
439 antibodies, the DNA from 200 µl of the grown bacteria was isolated with ethanol  
440 precipitation. The isolated DNA was subsequently amplified by the 16S rDNA specific  
441 primers LPW57 and LPW58 [47]. In brief, bacterial DNA was amplified with Taq-  
442 polymerase (0.005 u/µl, Rapidozym GmbH, Cat. No. GEN-003-1000), 3.12 mM MgCl<sub>2</sub>  
443 (Rapidozym GmbH), 1 X GenTherm buffer (Rapidozym GmbH), 0.25 mM dNTP mix  
444 (Thermo Scientific, Cat. No. R0192) and LPW57 and LPW 58 (1µM, TIB Molbiol) for  
445 35 amplification cycles in a thermocycler. The DNA product was verified by gel  
446 electrophoresis and purified with the NucleoSpin Gel and PCR Clean-up Kit  
447 (Macherey-Nagel, Cat. No. 740609.50). The concentration of the purified PCR product  
448 was adjusted to 5 ng/µl in 15 µl and send to Sanger sequencing by Eurofins Genomics.  
449 Sequence identity was determined with the Nucleotide Basic Local Alignment Search  
450 Tool (BLAST) provided by NCBI.

451

### 452 **Enzyme-linked immunosorbent assay**

453 For the detection of antibody titers in sera and fecal supernatants 96-well plates were  
454 coated with goat anti-human Ig (H+L chain) antibody (Southern Biotech, Cat. No. 2010-  
455 01) or goat anti-human IgA Fab (Southern Biotech, Cat. No. 2050-01) antibody for the  
456 detection of IgG, IgM and IgA respectively. After washing with 1x PBST for 30 second,  
457 the plates were blocked with 200 µL of 5% PBS/BSA for 1 hour at room temperature.  
458 Next, plates were washed 3 times with 200 µL of 1x PBST for 30 second at a time. The  
459 sera and fecal supernatants were diluted in PBS and 100 µL were added to the plate.  
460 Standards were diluted in PBS and applied to the plate: IgA1 (Genway, Cat. No.  
461 E04696), IgM (Sigma, Cat. No. 18260), IgA2 (Genway, Cat. No. 50D1F7), IgG  
462 (Janssen Biotech Inc.,) then the plates were incubated over night at 4°C. After that,  
463 plates were washed 5 times with 200 µL of 1x PBST and detection antibodies were  
464 applied: anti-human IgG-AP (ICN/Cappel, Cat No. 59289), anti-human IgM-AP (Sigma,  
465 Cat. No.A3437-.25ML), anti-human IgA-AP (Sigma, Cat.No. A2043), anti-human IgA1-

466 AP (SouthernBiotech, clone: B3506B4, Cat. No. 9130-04), anti-human IgA2-AP  
467 (SouthernBiotech, clone: A9604D2, Cat. No. 9140-04) and were incubated for 1 hour  
468 at 37°C. Subsequently, the plates were washed 5 times with 200 µL of 1x PBST 100  
469 µL of pNPP (Sigma, Cat. No. N2770) was added to each well . Reactions were stopped  
470 by addition of 3M NaOH. Optical densities were measured on Spectramax (Molecular  
471 devices).

472 To determine the SARS-Cov-2 specific antibody titers, 96-well plates were coated  
473 overnight with either 1 µg/ml recombinant SARS-CoV-2 (2019-nCoV) Spike Protein  
474 (RBD, His Tag, Sino biological, Cat. No. 40592-V08B-100) or recombinant SARS-CoV-  
475 2 Nucleocapsid His Protein, CF (RnD Systems; Cat. No. 10474-CV) protein or SARS-  
476 CoV-2 Spike RBM (receptor binding motif), 480-496 aa (Eurogentec; Cat. No: As-656-  
477 19). Plates were washed, blocked and the administration of sera and fecal  
478 supernatants were done as previously described [8]. To detect RBD-specific IgA, a  
479 biotinylated anti-human IgA antibody (Southern Biotech, Cat. No. 2050-08) was  
480 applied, followed by an incubation for 1 h at 37°C. After washing 6 times with PBST,  
481 avidin-HRP (Invitrogen, Cat. No. 88-7324-88) was added and after 1 hour incubation  
482 at RT and 5 times washing with PBST, Tetramethylbenzidine (TMB) Substrate  
483 (Invitrogen, Cat. No. 88-7324-88) was added. The reaction was stopped by addition of  
484 2N H2SO4. Optical densities were measured on Spectramax (Molecular devices).

485

#### 486 **Epitope mapping for anti-RBD antibodies**

487 Epitope mapping was performed using peptide microarray multiwell replitope SARS-  
488 CoV-2 Spike glycoprotein (SPIKE) wild type + mutations (JPT Peptide Technologies  
489 GmbH; RT-MW-WCPV-S-V02). Microarray was incubated with monoclonal anti-RBD  
490 antibodies (final concentration 1 mcg/ml) or mouse fecal supernatants (1:1 dilution) at  
491 30 C for 1 hours with constant rotation. Slides were washed three times with TBS buffer  
492 with 0,05 % Tween-20 and further incubated with anti-rabbit Alexa 647 (Jackson  
493 ImmunoResearch Cat. No. 111-606-144), anti-human IgG-Alexa647 (Southern  
494 Biotech; Cat. No.: 2040-31), goat anti-Mouse IgA Antibody DyLight® 650 (Bethyl  
495 Laboratories; Cat.No.: A90-103D5) at 30 C for 1 hour. Samples were washed with  
496 TBS-T and deionized water, dried by centrifugation. Peptide microarray was analysed  
497 using microarry scanner Innoscan 710 (Innopsys). Fluorescence intensities were  
498 quantified using ImagePix.



499

## 500 **Flow cytometric assay for analysis of ACE2-RBD interaction**

501 HEK293T cells were transfected with a plasmid expressing human ACE2 protein. Next  
502 day, the proportion of transfected cells was determined by staining with biotinylated  
503 RBD (Sino biologicals, Cat: 40592-V08H-B) for 30 min. The cells were washed s once  
504 with PBS/ 0.2 % BSA and subsequently stained with streptavidin-FITC (Thermo  
505 Fischer Scientific: Cat. No. 11-4317-87). Further transfected cells were collected and  
506 incubated with biological samples for 30 min, washed twice with PBS/BSA and  
507 incubated with biotinylated RBD (Sino biologicals, Cat: 40592-V08H-B) for 30 min,  
508 washed once with PBS/ 0.2 % BSA and subsequently stained with streptavidin-FITC  
509 (Thermo Fischer Scientific: Cat. No. 11-4317-87). Cells were washed with PBS/ 0.2  
510 % BSA measured directly. Dead cell exclusion was done by DAPI. Samples were  
511 acquired on a FACSCanto (BD Biosciences) and analyzed using FlowJo v10 (Tree  
512 Star Inc.) analysis software.

513

## 514 **Mice immunizations**

515 Grown bacteria were collected, washed three times with PBS and heat-inactivated at  
516 65 C for 1 hr. Heat inactivated bacteria were resuspended with final OD<sub>600</sub> equals 1.0.  
517 C57Bl/6 mice were injected with 200 µl of heat-killed bacteria i.p. From oral gavage,  
518 live bacteria stocks were grown, washed with PBS several times, OD<sub>600</sub> was adjusted  
519 to 1, 200 µl of live bacteria was gavaged every second day. All animal procedures were  
520 performed in accordance with Russian regulations of animal protection.

521

## 522 **Protein gel electrophoresis and Western blotting**

523 48 h bacterial cultures were pelleted and were resuspended in RIPA buffer containing  
524 protease inhibitors cocktail (Roche, Cat. No. 11 836 145 001). Samples were sonicated  
525 at 50% voltage for 5 cycles of 10 sec pulses followed by 30 sec rest on ice. After  
526 sonication glass beads (MP Biomedicals, Cat. No. 6911100) were added as 1/3 of total  
527 volume to the bacterial extract. Samples were vortexed for 30 sec followed by chilling  
528 on ice for 30 sec (for a total of 5 cycles). Lysates were spun down for 10 min at 20,000  
529 xg and supernatant was collected. For western blot analysis samples were run on 12%

530 SDS-PAGE under reducing conditions and transferred to PVDF membrane (Bio-Rad,  
531 Cat. No. 1620177). SARS-CoV-2 (2019-nCoV) Spike RBD-His Recombinant Protein  
532 (Sino Biological, Cat. No. 40592-V08B-100) was used as a positive control. Membrane  
533 was blocked by incubation in 5% non-fat milk (Roth, Cat. No. 68514-61-4) in TBST  
534 buffer for 1 h at room temperature with constant shaking. Subsequently membrane  
535 was hybridized with rabbit neutralizing anti-RBD antibody (Sino Biological, Cat. No.  
536 40592-R001) or human derived RBD neutralising antibodies in blocking solution for 1h  
537 at room temperature with constant shaking. Membrane was then washed in TBST and  
538 incubated with anti-rabbit IgG-HRP (Cell signaling, Cat. No. 7074S) or with anti-human  
539 IgG-HRP (Southern Biotech, Cat. No. 2040-05) for 1 h at room temperature with  
540 constant shaking. SuperSignal West Femto Maximum Sensitivity (Thermo Fisher  
541 scientific, Cat No. 34095) substrate kit was used. The signal was acquired using Chemi  
542 Doc imaging system (Bio-rad).

543

#### 544 **Mass-spectroscopy analysis of proteins**

545 The protein bands after 1D-PAGE were excised and washed twice with 100 mL of 0.1  
546 M NH<sub>4</sub>HCO<sub>3</sub> (pH 7.5) and 50% acetonitrile mixture at 50 °C until the piece of gel  
547 becomes transparent. Protein cysteine bonds were reduced with 10mM DTT in 50 mM  
548 NH<sub>4</sub>HCO<sub>3</sub> for 30 min at 56 °C and alkylated with 15 mM iodoacetamide in the dark at  
549 RT for 30 min. The step with adding DTT was repeated. Then gel pieces were  
550 dehydrated with 100 mcl of acetonitrile, air-dried and treated by 10 mkl of 12 mg/mL  
551 solution of trypsin (Trypsin Gold, Mass Spectrometry Grade, Promega) in 50 mM  
552 ammonium bicarbonate for 15 h at 37°C. Peptides were extracted with 20 mcl of 0.5%  
553 trifluoroacetic acid water solution for 30 min with sonication, dried in a SpeedVac  
554 (Labconco) and resuspended in 3% ACN, 0.1% TFA. Aliquots (2 mcl) from the sample  
555 were mixed on a steel target with 0.3 mcl of 2,5-dihydroxybenzoic acid (SigmaAldrich)  
556 solution (30 mg in 400mkl of 30% acetonitrile/0.5% trifluoroacetic acid), and the droplet  
557 was left to dry at room temperature. Mass spectra were recorded on the Ultraflex II  
558 MALDI-ToF-ToF mass spectrometer (Bruker Daltonik, Germany) equipped with an Nd  
559 laser. The [MH]<sup>+</sup> molecular ions were measured in reflector mode, the accuracy of the  
560 mass peak measurement was 0.007%. Fragment ion spectra were generated by laser-  
561 induced dissociation, slightly accelerated by low-energy collision-induced dissociation,  
562 using helium as a collision gas. The accuracy of the fragment ions mass peak

563 measurement was 1Da. Correspondence of the found MS/MS fragments to the  
564 proteins was performed with the help of Biotoools software (Bruker Daltonik, Germany)  
565 and a Mascot MS/MS ion search.

566

### 567 **Protein expression**

568 Uncharacterised protein RSSL-01370 was amplified from the genomic DNA of  
569 *Streptococcus salivarius K12* using the following primers: 5'-  
570 CTCCATATGAATTTACCAAGTCACCATAACAAGGG -'3 and 5'-  
571 GTGGTCGACATTCACTTTTTTCAGTTGCTACACC -'3 and subsequently cloned into  
572 pET-21b containing *NdeI* and *XhoI* restriction sites. Next, overnight culture of the  
573 selected clone was inoculated into 2xTY growth medium containing 100 µg/ml of  
574 ampicillin and grown at 30 °C with constant shaking until OD600 reached 0,8. Protein  
575 expression was induced by 0,6 mM of IPTG for the next 4 hours at 30 °C. Bacterial  
576 lysate was prepared and analysed as described earlier.

577

### 578 **Purification of IgA from fecal material**

579 Human IgA was purified from fecal supernatants with Peptide M/ Agarose (InvivoGen,  
580 Cat. No. gel-pdm-2) as described by the manufacturer. Peptide M/ Agarose was used  
581 to prepare a column which was equilibrated with 20 mM sodium phosphate buffer (pH  
582 7). Subsequently the 0.2 µM filtered fecal supernatant was applied on the column at  
583 least three times. The fecal IgA was eluted from the column after a washing step with  
584 20 mM sodium phosphate, with 0.1 M Glycine-HCl. The elution was neutralized with 1  
585 M Tris/HCl and was concentrated via dialysis. Finally, the IgA concentration was  
586 determined with a NanoDrop 2000C (Thermo Scientific) or ELISA.

587

### 588 **Acknowledgements:**

589 We are grateful to Timo Rückert, Lennard Ostendorf, & Marie Burns for the help in  
590 blood collection, to the members of the German Rheumatism Research Center Flow  
591 Cytometry Core Facility (T. Kaiser, J. Kirsch, & R. Maier) for help with FACS analysis  
592 and cell sorting, and to James Cameron for his careful editing. We thank Sergei

593 Nedospasov (MSU, Moscow, Russia) and members of DRFZ B cell club for useful  
594 discussions.

#### 595 **Funding:**

596 Work was supported by DFG (TR241 A04, A.K. and B03, H.-D.C., A.R.), Dr.  
597 Rolf M. Schwiete Foundation (J.N., L. B., H.-D.C.) and Russian Science Foundation  
598 grants # 21-14-00223 (A.K.) and Russian Fund for Basic Research #17-00-00435  
599 (V.M.G) and #17-00-00268 (A.A.K). This Work was supported by the state of Berlin  
600 and the “European Regional Development Fund” to M.F.M. (ERDF 2014–2020, EFRE  
601 1.8/11, Deutsches Rheuma-Forschungszentrum), the Berlin Institute of Health with the  
602 Starting Grant - Multi-Omics Characterization of SARS-CoV-2 infection, Project 6  
603 ”Identifying immunological targets in Covid-19” to A.D. and M.F.M., by the Deutsche  
604 Forschungsgemeinschaft through TRR130 P16 to A.R., H.D.C. and P17 to H.R., by  
605 the European Research Council through the Advanced Grant IMMEMO (ERC-2010-  
606 AdG.20100317 Grant 268978) to A.R.

607

#### 608 **Author contributions**

609 A.K., designed the study. J.N., L. B., M. B. A.K., did most of the experiments and  
610 analysed data. J.K., M. R., H.P. generated human monoclonal neutralising anti-RBD  
611 antibodies. S.Y. performed IgA purification and analysis of antibody concentrations by  
612 ELISA. P.D., G.H. M.-F.M., performed 16S bacteria sequencing. D.M., V.G., I.S.,  
613 performed mass-spectroscopy of isolated proteins. C.T., S. A., S. T., K. S., P.E., M.W.,  
614 collected samples, analysed clinical data from COVID-19 patients. M.R., G. S.,  
615 performed neutralisation assay. H.-D.C., A.R., A.D., M.W., H.P., M.-F.M., A.K.  
616 designed the study and contributed to the writing of the manuscript.

617 **Competing interests:** J.N., L. B., and A.K. have a pending patent application with  
618 regard to utilization of commensal bacteria for induction of antiviral immune responses.

619

#### 620 **References**

- 621 1 Zhou P, Yang XL, Wang XG, Hu B, Zhang L, Zhang W, *et al.* A pneumonia outbreak associated  
622 with a new coronavirus of probable bat origin. *Nature* 2020;**579**:270-3.
- 623 2 Hoffmann M, Kleine-Weber H, Schroeder S, Kruger N, Herrler T, Erichsen S, *et al.* SARS-CoV-2  
624 Cell Entry Depends on ACE2 and TMPRSS2 and Is Blocked by a Clinically Proven Protease Inhibitor.  
625 *Cell* 2020;**181**:271-80 e8.

- 626 3 Shang J, Wan Y, Luo C, Ye G, Geng Q, Auerbach A, *et al.* Cell entry mechanisms of SARS-CoV-  
627 2. *Proc Natl Acad Sci U S A* 2020;**117**:11727-34.
- 628 4 Walls AC, Park YJ, Tortorici MA, Wall A, McGuire AT, Velesler D. Structure, Function, and  
629 Antigenicity of the SARS-CoV-2 Spike Glycoprotein. *Cell* 2020;**181**:281-92 e6.
- 630 5 Cao Y, Su B, Guo X, Sun W, Deng Y, Bao L, *et al.* Potent Neutralizing Antibodies against SARS-  
631 CoV-2 Identified by High-Throughput Single-Cell Sequencing of Convalescent Patients' B Cells. *Cell*  
632 2020;**182**:73-84 e16.
- 633 6 Ju B, Zhang Q, Ge J, Wang R, Sun J, Ge X, *et al.* Human neutralizing antibodies elicited by  
634 SARS-CoV-2 infection. *Nature* 2020;**584**:115-9.
- 635 7 Renegar KB, Small PA, Jr., Boykins LG, Wright PF. Role of IgA versus IgG in the control of  
636 influenza viral infection in the murine respiratory tract. *J Immunol* 2004;**173**:1978-86.
- 637 8 Ferreira-Gomes M, Kruglov A, Durek P, Heinrich F, Tizian C, Heinz GA, *et al.* SARS-CoV-2 in  
638 severe COVID-19 induces a TGF-beta-dominated chronic immune response that does not target itself.  
639 *Nat Commun* 2021;**12**:1961.
- 640 9 Ng KW, Faulkner N, Cornish GH, Rosa A, Harvey R, Hussain S, *et al.* Preexisting and de novo  
641 humoral immunity to SARS-CoV-2 in humans. *Science* 2020;**370**:1339-43.
- 642 10 Simula ER, Manca MA, Jasemi S, Uzzau S, Rubino S, Manchia P, *et al.* HCoV-NL63 and SARS-  
643 CoV-2 Share Recognized Epitopes by the Humoral Response in Sera of People Collected Pre- and  
644 during CoV-2 Pandemic. *Microorganisms* 2020;**8**.
- 645 11 Majdoubi A, Michalski C, O'Connell SE, Dada S, Narpala SR, Gelinis JP, *et al.* A majority of  
646 uninfected adults show pre-existing antibody reactivity against SARS-CoV-2. *JCI Insight* 2021.
- 647 12 Anderson EM, Goodwin EC, Verma A, Arevalo CP, Bolton MJ, Weirick ME, *et al.* Seasonal  
648 human coronavirus antibodies are boosted upon SARS-CoV-2 infection but not associated with  
649 protection. *Cell* 2021.
- 650 13 Sokal A, Chappert P, Barba-Spaeth G, Roeser A, Fourati S, Azzaoui I, *et al.* Maturation and  
651 persistence of the anti-SARS-CoV-2 memory B cell response. *Cell* 2021;**184**:1201-13 e14.
- 652 14 Macpherson AJ, Yilmaz B, Limenitakis JP, Ganai-Vonarburg SC. IgA Function in Relation to the  
653 Intestinal Microbiota. *Annu Rev Immunol* 2018;**36**:359-81.
- 654 15 Tierney BT, Yang Z, Lubner JM, Beaudin M, Wibowo MC, Baek C, *et al.* The Landscape of  
655 Genetic Content in the Gut and Oral Human Microbiome. *Cell Host Microbe* 2019;**26**:283-95 e8.
- 656 16 Yang X, Xie L, Li Y, Wei C. More than 9,000,000 unique genes in human gut bacterial  
657 community: estimating gene numbers inside a human body. *PLoS One* 2009;**4**:e6074.
- 658 17 Zarate-Blades CR, Horai R, Mattapallil MJ, Ajami NJ, Wong M, Petrosino JF, *et al.* Gut  
659 microbiota as a source of a surrogate antigen that triggers autoimmunity in an immune privileged  
660 site. *Gut Microbes* 2017;**8**:59-66.
- 661 18 Gil-Cruz C, Perez-Shibayama C, De Martin A, Ronchi F, van der Borgh K, Niederer R, *et al.*  
662 Microbiota-derived peptide mimics drive lethal inflammatory cardiomyopathy. *Science*  
663 2019;**366**:881-6.
- 664 19 Greiling TM, Dehner C, Chen X, Hughes K, Iniguez AJ, Boccitto M, *et al.* Commensal orthologs  
665 of the human autoantigen Ro60 as triggers of autoimmunity in lupus. *Sci Transl Med* 2018;**10**.
- 666 20 Ren Z, Wang Y, Duan T, Patel J, Liggett T, Loda E, *et al.* Cross-immunoreactivity between  
667 bacterial aquaporin-Z and human aquaporin-4: potential relevance to neuromyelitis optica. *J*  
668 *Immunol* 2012;**189**:4602-11.
- 669 21 Planas R, Santos R, Tomas-Ojer P, Cruciani C, Lutterotti A, Faigle W, *et al.* GDP-l-fucose  
670 synthase is a CD4(+) T cell-specific autoantigen in DRB3\*02:02 patients with multiple sclerosis. *Sci*  
671 *Transl Med* 2018;**10**.
- 672 22 Bunker JJ, Erickson SA, Flynn TM, Henry C, Koval JC, Meisel M, *et al.* Natural polyreactive IgA  
673 antibodies coat the intestinal microbiota. *Science* 2017;**358**.
- 674 23 Robak OH, Heimesaat MM, Kruglov AA, Prepens S, Ninnemann J, Gutbier B, *et al.* Antibiotic  
675 treatment-induced secondary IgA deficiency enhances susceptibility to *Pseudomonas aeruginosa*  
676 pneumonia. *J Clin Invest* 2018;**128**:3535-45.

- 677 24 Ichinohe T, Pang IK, Kumamoto Y, Peaper DR, Ho JH, Murray TS, *et al.* Microbiota regulates  
678 immune defense against respiratory tract influenza A virus infection. *Proc Natl Acad Sci U S A*  
679 2011;**108**:5354-9.
- 680 25 Schaupp L, Muth S, Rogell L, Kofoed-Branzk M, Melchior F, Lienenklaus S, *et al.* Microbiota-  
681 Induced Type I Interferons Instruct a Poised Basal State of Dendritic Cells. *Cell* 2020;**181**:1080-96 e19.
- 682 26 Stefan KL, Kim MV, Iwasaki A, Kasper DL. Commensal Microbiota Modulation of Natural  
683 Resistance to Virus Infection. *Cell* 2020;**183**:1312-24 e10.
- 684 27 Trama AM, Moody MA, Alam SM, Jaeger FH, Lockwood B, Parks R, *et al.* HIV-1 envelope gp41  
685 antibodies can originate from terminal ileum B cells that share cross-reactivity with commensal  
686 bacteria. *Cell Host Microbe* 2014;**16**:215-26.
- 687 28 Pabst O, Slack E. IgA and the intestinal microbiota: the importance of being specific. *Mucosal*  
688 *Immunol* 2020;**13**:12-21.
- 689 29 Kreye J, Reincke SM, Kornau HC, Sanchez-Sendin E, Corman VM, Liu H, *et al.* A Therapeutic  
690 Non-self-reactive SARS-CoV-2 Antibody Protects from Lung Pathology in a COVID-19 Hamster Model.  
691 *Cell* 2020;**183**:1058-69 e19.
- 692 30 Bastard P, Rosen LB, Zhang Q, Michailidis E, Hoffmann HH, Zhang Y, *et al.* Autoantibodies  
693 against type I IFNs in patients with life-threatening COVID-19. *Science* 2020;**370**.
- 694 31 Zeberg H, Paabo S. The major genetic risk factor for severe COVID-19 is inherited from  
695 Neanderthals. *Nature* 2020;**587**:610-2.
- 696 32 Zhou F, Yu T, Du R, Fan G, Liu Y, Liu Z, *et al.* Clinical course and risk factors for mortality of  
697 adult inpatients with COVID-19 in Wuhan, China: a retrospective cohort study. *Lancet*  
698 2020;**395**:1054-62.
- 699 33 Bacher P, Rosati E, Esser D, Martini GR, Saggau C, Schiminsky E, *et al.* Low-Avidity CD4(+) T  
700 Cell Responses to SARS-CoV-2 in Unexposed Individuals and Humans with Severe COVID-19.  
701 *Immunity* 2020;**53**:1258-71 e5.
- 702 34 Geva-Zatorsky N, Sefik E, Kua L, Pasman L, Tan TG, Ortiz-Lopez A, *et al.* Mining the Human  
703 Gut Microbiota for Immunomodulatory Organisms. *Cell* 2017;**168**:928-43 e11.
- 704 35 Bradley KC, Finsterbusch K, Schnepf D, Crotta S, Llorian M, Davidson S, *et al.* Microbiota-  
705 Driven Tonic Interferon Signals in Lung Stromal Cells Protect from Influenza Virus Infection. *Cell Rep*  
706 2019;**28**:245-56 e4.
- 707 36 Beller A, Kruglov A, Durek P, von Goetze V, Werner K, Heinz GA, *et al.* Specific microbiota  
708 enhances intestinal IgA levels by inducing TGF-beta in T follicular helper cells of Peyer's patches in  
709 mice. *Eur J Immunol* 2020;**50**:783-94.
- 710 37 Jeffries TL, Jr., Sacha CR, Pollara J, Himes J, Jaeger FH, Dennison SM, *et al.* The function and  
711 affinity maturation of HIV-1 gp120-specific monoclonal antibodies derived from colostrum B cells.  
712 *Mucosal Immunol* 2016;**9**:414-27.
- 713 38 Williams WB, Liao HX, Moody MA, Kepler TB, Alam SM, Gao F, *et al.* HIV-1 VACCINES.  
714 Diversion of HIV-1 vaccine-induced immunity by gp41-microbiota cross-reactive antibodies. *Science*  
715 2015;**349**:aab1253.
- 716 39 Fajnzylber J, Regan J, Coxen K, Corry H, Wong C, Rosenthal A, *et al.* SARS-CoV-2 viral load is  
717 associated with increased disease severity and mortality. *Nat Commun* 2020;**11**:5493.
- 718 40 Liu Y, Yan LM, Wan L, Xiang TX, Le A, Liu JM, *et al.* Viral dynamics in mild and severe cases of  
719 COVID-19. *Lancet Infect Dis* 2020;**20**:656-7.
- 720 41 Yeoh YK, Zuo T, Lui GC, Zhang F, Liu Q, Li AY, *et al.* Gut microbiota composition reflects  
721 disease severity and dysfunctional immune responses in patients with COVID-19. *Gut* 2021;**70**:698-  
722 706.
- 723 42 Zuo T, Zhang F, Lui GCY, Yeoh YK, Li AYL, Zhan H, *et al.* Alterations in Gut Microbiota of  
724 Patients With COVID-19 During Time of Hospitalization. *Gastroenterology* 2020;**159**:944-55 e8.
- 725 43 Gu S, Chen Y, Wu Z, Chen Y, Gao H, Lv L, *et al.* Alterations of the Gut Microbiota in Patients  
726 with COVID-19 or H1N1 Influenza. *Clin Infect Dis* 2020.
- 727 44 Rincon-Arevalo H CM, Stefanski AL, Halleck F, Weber U, Szelinski F, Jahrsdörfer B,  
728 Schrezenmeier H, Ludwig C, Sattler A, Kotsch K, Potekhin A, Chen Y, Burmester GR, Eckardt KU,  
729 Guerra GM, Durek P, Heinrich F, Ferreira-Gomes M, Radbruch A, Budde K, Lino AC, Mashreghi MF,

730 Schrezenmeier E, Dörner T. Impaired humoral immunity to SARS-CoV-2 BNT162b2 vaccine in kidney  
731 transplant recipients and dialysis patients. *Science Immunology* 2021.  
732 45 Jari Oksanen FGB, Michael Friendly, Roeland Kindt, Pierre Legendre, Dan McGlenn, Peter R.  
733 Minchin, R.B. O'Hara, Gavin L. Simpson, Peter Solymos, M. Henry H. Stevens, Eudard Szoecs, Helene  
734 Wagner. *vegan: Community Ecology Package*. 2020.  
735 46 Segata N, Izard J, Waldron L, Gevers D, Miropolsky L, Garrett WS, *et al.* Metagenomic  
736 biomarker discovery and explanation. *Genome Biol* 2011;**12**:R60.  
737 47 Woo PC, Leung PK, Leung KW, Yuen KY. Identification by 16S ribosomal RNA gene sequencing  
738 of an Enterobacteriaceae species from a bone marrow transplant recipient. *Mol Pathol* 2000;**53**:211-  
739 5.

740

741

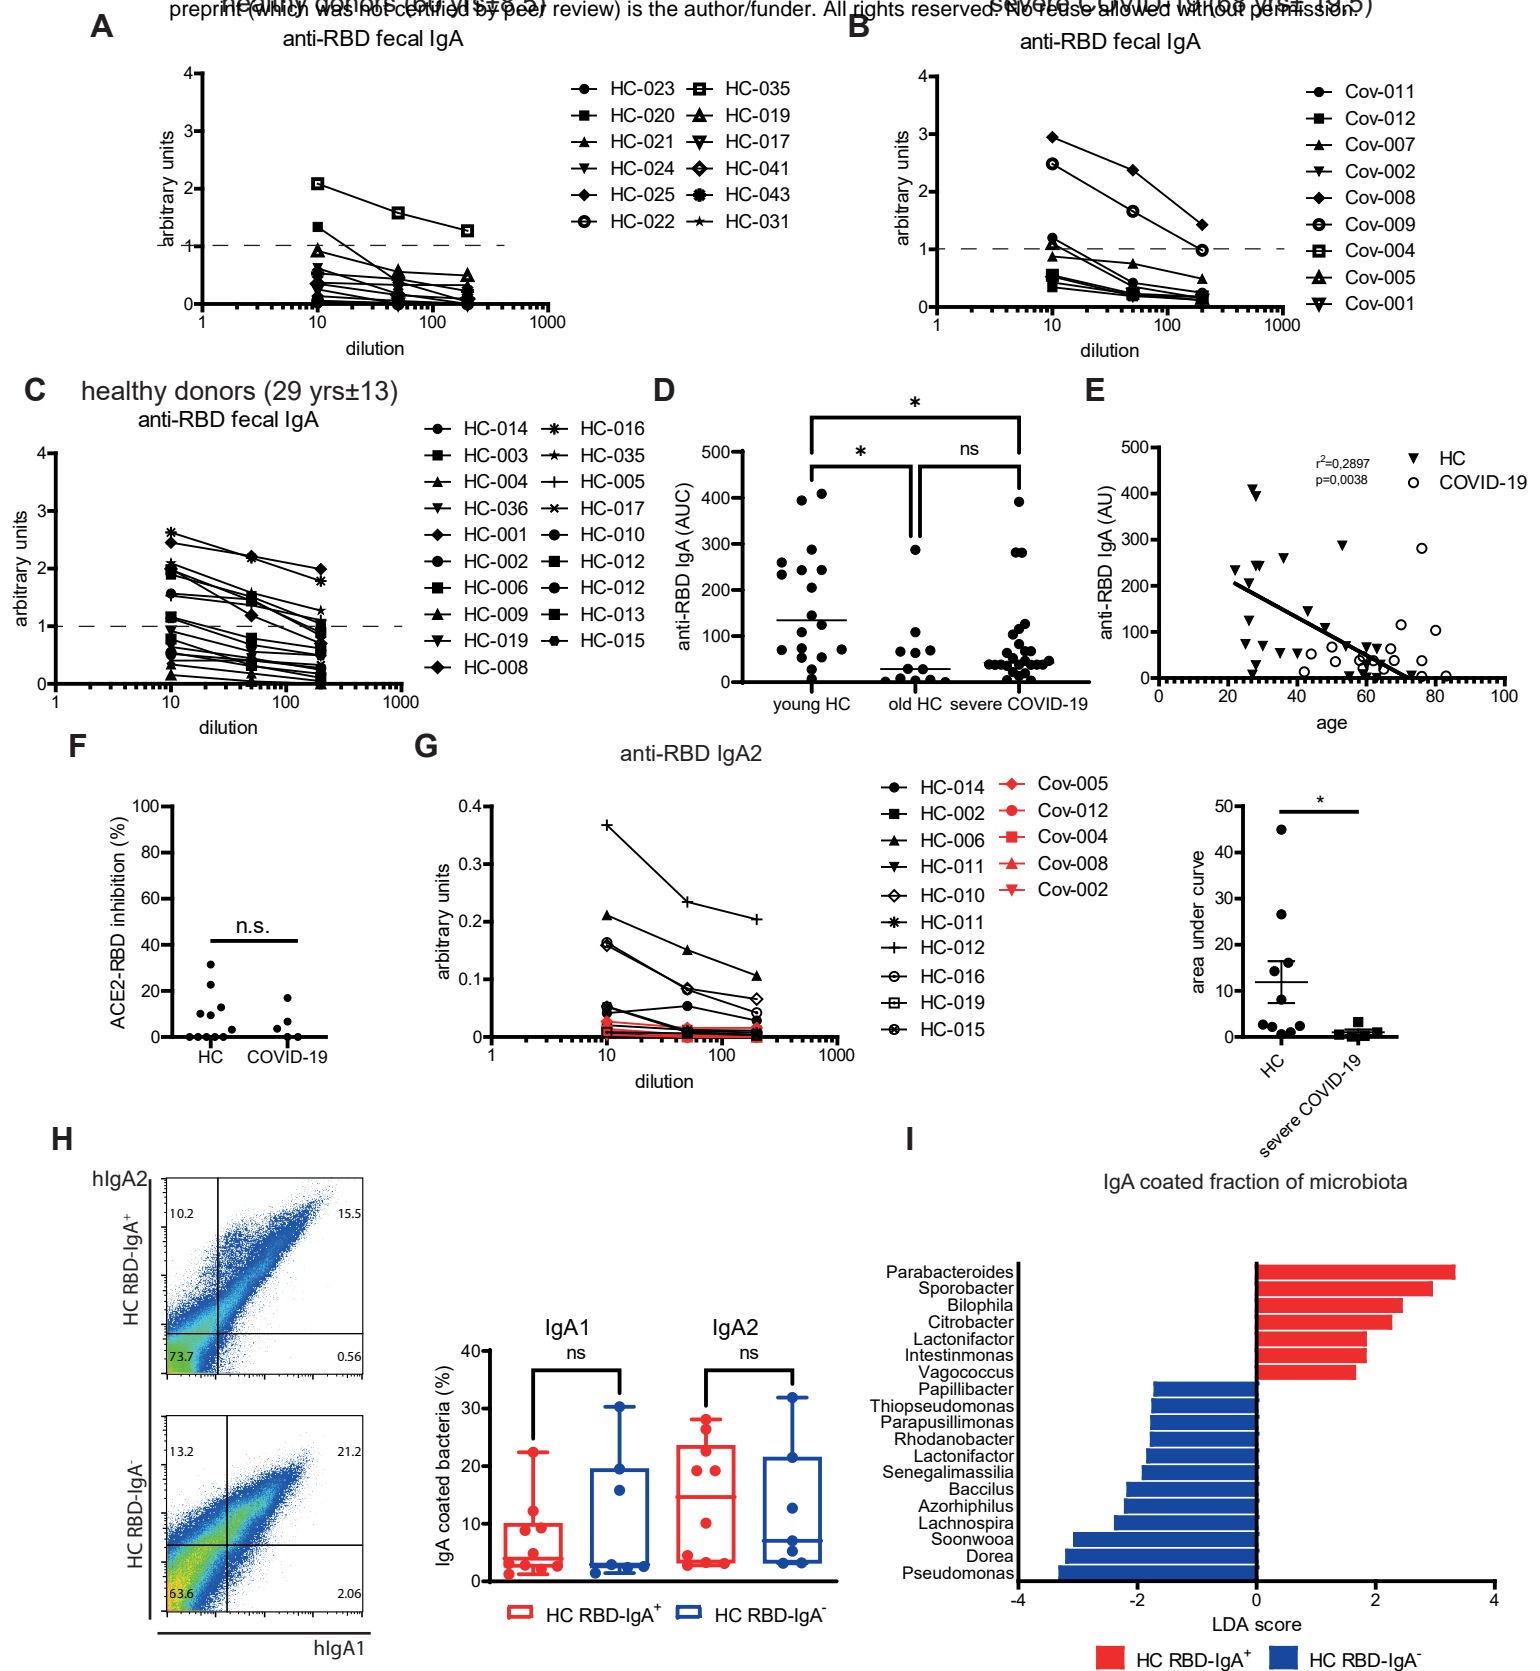

**Fig. 1. Presence of mucosal IgA antibodies reactive against RBD in healthy individuals.** Levels of anti-RBD IgA in fecal supernatants of age-matched healthy (**A**) and severe COVID-19 (**B**) individuals. (**C**) Levels of anti-RBD IgA in fecal supernatants of young healthy individuals. (**D**) Area under the curve (AUC) values for the anti-RBD IgA ELISA measurement of the donors presented in (**A-C**). (**E**) Correlation of the levels of anti-RBD IgA with the age in healthy individuals and COVID-19 patients. (**F**) Inhibition of RBD binding to ACE2 by IgA purified from feces of healthy people and severe COVID-19 patients. (**G**). Levels and AUC values of anti-RBD IgA2 in purified IgA fraction from healthy and severe COVID-19 individuals. (**H**). Representative dot plots and quantification of fecal IgA coating from healthy individuals that have anti-RBD IgA (HC RBD-IgA<sup>+</sup>) or lack anti-RBD IgA (HC RBD-IgA<sup>-</sup>). (**I**) Linear discriminant analysis (LDA) scores of the IgA bound bacterial fraction isolated from HC RBD-IgA<sup>+</sup> and HC RBD-IgA<sup>-</sup>. \*,  $p < 0.05$ , \*\*,  $p < 0.01$ , \*\*\*,  $p < 0.001$ , as calculated by unpaired t-test (F, G, H) or by Kruskal-Wallis test with Dunn's multiple comparisons (D); ns, not significant.



**A**

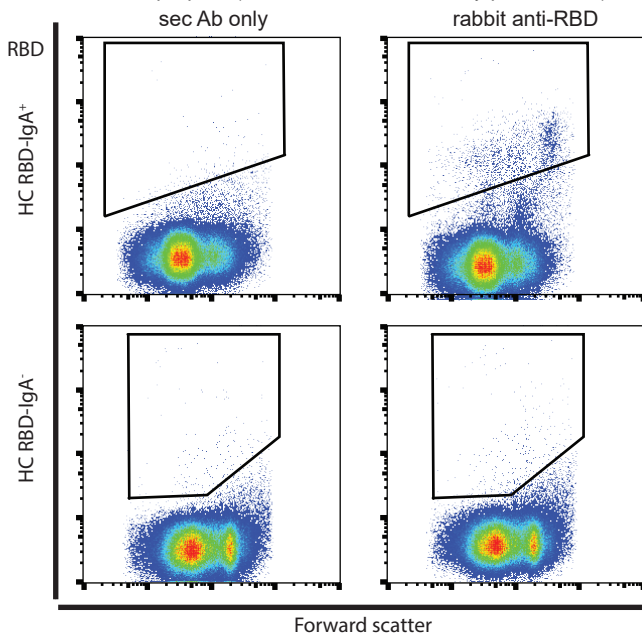

**B**

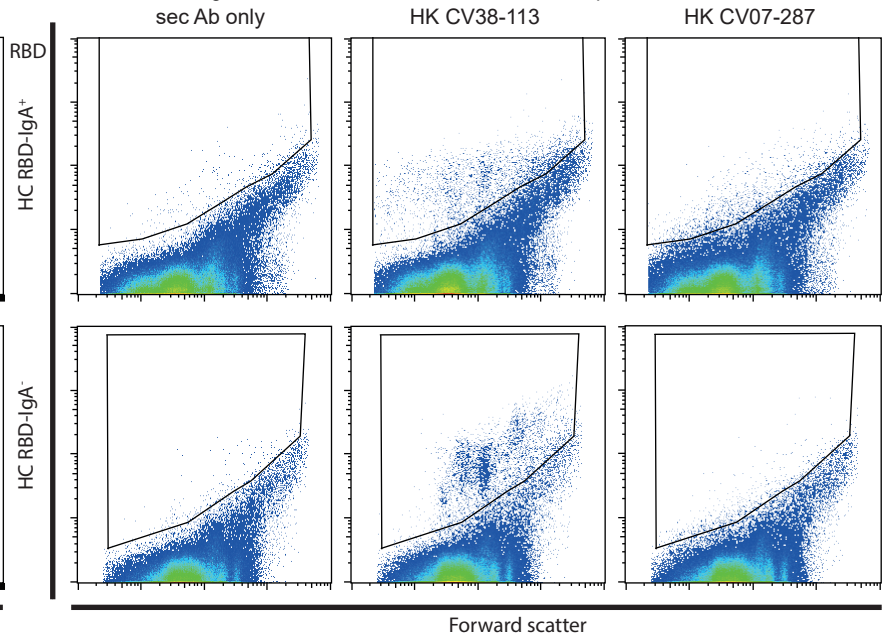

**C**

| clone           | RBD-IgA+ |        | RBD-IgA- |        |        |
|-----------------|----------|--------|----------|--------|--------|
|                 | HC-001   | HC-003 | HC-011   | HC-009 | HC-043 |
| HK CV38-113     | 0        | 1,65   | 0,72     | 1,14   | 2,09   |
| HK CV07-287     | 0        | 0      | 0        | 0      | 0      |
| HL CV07-270     | 2,1      | 6,59   | 5,46     | 5,31   | 5,11   |
| HK CV-X2-106    | 0        | 1,06   | 0        | 0      | 0      |
| HK CV07-283     | 0,74     | 0,89   | 0        | 0      | 0      |
| HL CV07-262     | 0,64     | 0,64   | 0        | 0      | 0      |
| HL CV07-250     | 0        | 0      | 0        | 0      | 0      |
| HL CV07-222     | 0,55     | 1,37   | 0        | 0      | 0      |
| HK CV-X1-126    | 1,04     | 0,86   | 2,36     | 1,95   | 2      |
| HL CV07-200     | 1,68     | 1,51   | 0        | 0      | 0,32   |
| HL CV07-315     | 0,85     | 1,03   | 2,14     | 1,04   | 1,56   |
| HK CV38-221     | 1,9      | 0,86   | 0        | 0      | 2,5    |
| HK CV38-139     | 1        | 1,42   | 2,94     | 1,75   | 2,94   |
| HK CV05-163     | 2,15     | 5,15   | 3,46     | 2,66   | 1,61   |
| HL CV07-255     | 1,87     | 2,76   | 0        | 1,28   | 0,44   |
| rabbit anti-RBD | 1,01     | 3,82   | 0,17     | 0,9    | 0,32   |

**D**

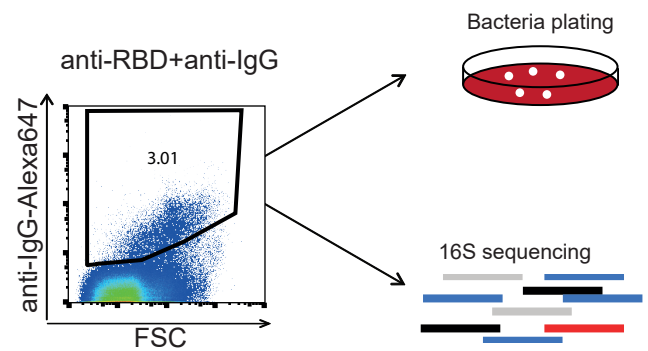

**E**

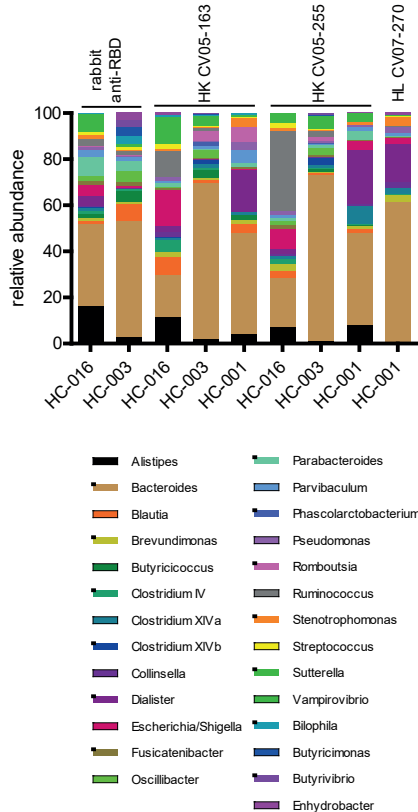

**F**

| Bacterial strain                         | rabbit anti-RBD | HL CV07-270 | HK CV-X1-126 | HL CV07-200 | HL CV07-315 | HK CV05-163 | HL CV07-255 |
|------------------------------------------|-----------------|-------------|--------------|-------------|-------------|-------------|-------------|
| <i>Streptococcus salivarius</i>          | x               | x           |              |             | x           |             | x           |
| <i>Sterptococcus australis/ Rubneri</i>  | x               |             |              |             |             |             | x           |
| <i>Streptococcus Parasanguinis</i>       |                 | x           |              |             | x           |             | x           |
| <i>Escherichia Coli</i>                  | x               | x           |              |             | x           | x           | x           |
| <i>Bacillus safensis</i>                 | x               |             |              | x           | x           |             |             |
| <i>Bacillus cereus</i>                   |                 |             |              | x           | x           |             |             |
| <i>Escherichia fergusonii</i>            | x               | x           |              |             | x           |             |             |
| <i>Bifidobacterium pseudocatenulatum</i> |                 | x           |              |             |             |             | x           |
| <i>Bifidobacterium longum</i>            |                 |             |              |             |             |             | x           |
| <i>Enterococcus Hirae</i>                |                 | x           |              |             |             |             | x           |
| <i>Enterococcus faecalis</i>             |                 |             | x            |             | x           |             |             |
| <i>Acidaminococcus intestinalis</i>      |                 |             |              |             | x           |             |             |
| <i>Veillonella parvula</i>               |                 |             |              |             | x           |             |             |

**Fig. 2. Neutralising anti-RBD antibodies recognize distinct commensal bacteria.**

(A) Representative dot plots of human fecal microbiota stained with neutralising anti-RBD antibody raised in rabbit. (B) Representative dot plots of microbiota stained with monoclonal neutralising anti-RBD antibodies derived from COVID-19 patients. (C) Frequency of bacteria bound by human neutralising anti-RBD antibodies towards microbiota from healthy individuals. Fecal microbiota from 5 healthy donors were stained with 15 monoclonal anti-RBD antibodies from COVID-19 patients or anti-rabbit RBD, followed by respective secondary fluorochrome-coupled antibodies. Bound bacterial fraction was defined via comparison of stained sample with sample stained only with secondary antibody. (D) Strategy for the identification of bacteria that is bound by anti-RBD antibodies. (E) Relative abundance of bacterial genera of greater than 1% abundance in sorted bacterial fractions bound by various anti-RBD antibodies. 16S rRNA V3-V4 region of sorted bacteria was sequenced and annotated to corresponding bacteria. Abundance was calculated in relation to the number of total reads. Genera with abundance higher than 1% were further selected. Frequencies of selected genera were further normalized to 100%. (F) List of cloned bacteria isolated based on the binding to anti-RBD antibodies.

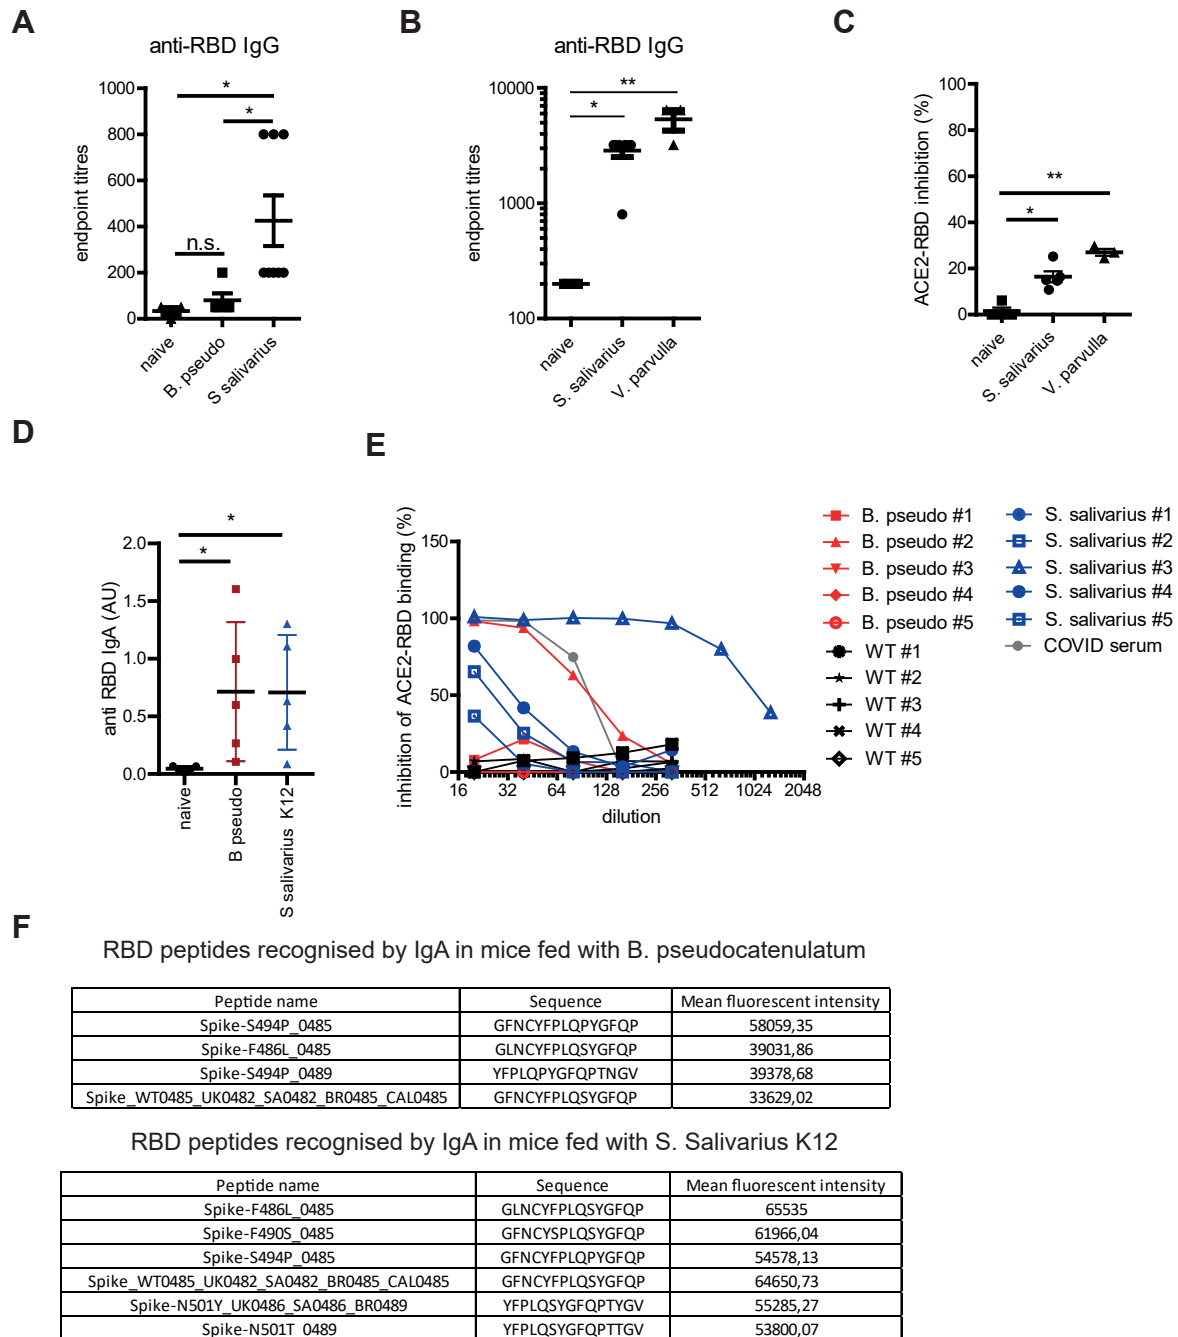

**Fig. 3. Commensal microbiota species can induce neutralising anti-RBD response.**

(A) anti-RBD IgG titers at day 14 in mice immunized with heat-killed *S. salivarius* and *B. pseudocatenulatum*. Mice were immunized as described in materials and methods. (B) anti-RBD IgG titers in mice immunized with isolated, heat-killed *V. parvulla* and *S. salivarius* K12. (C) Inhibition of RBD binding to ACE2 by sera from animals primed with heat-inactivated bacteria 14 days after immunization. (D) Induction of anti-RBD IgA response by oral bacterial supplementation. Mice were orally gavaged every second day as described in materials and methods. Anti-RBD IgA was analyzed in fecal supernatants. (E) Inhibition of ACE2-RBD binding by fecal supernatants from mice treated as in D. (F) RBD peptides recognized by the antibodies elicited upon oral supplementation of mice with *S. salivarius* K12 and *B. pseudocatenulatum* for 3 weeks. Kruskal-Wallis test with Dunn's multiple comparisons was used for (C) and (D). \*,  $p < 0.05$ , \*\*,  $p < 0.01$ , \*\*\*,  $p < 0.001$ , ns, not significant. Two-way ANOVA with Bonferroni's correction was applied for the statistical evaluation of (A) and (B).

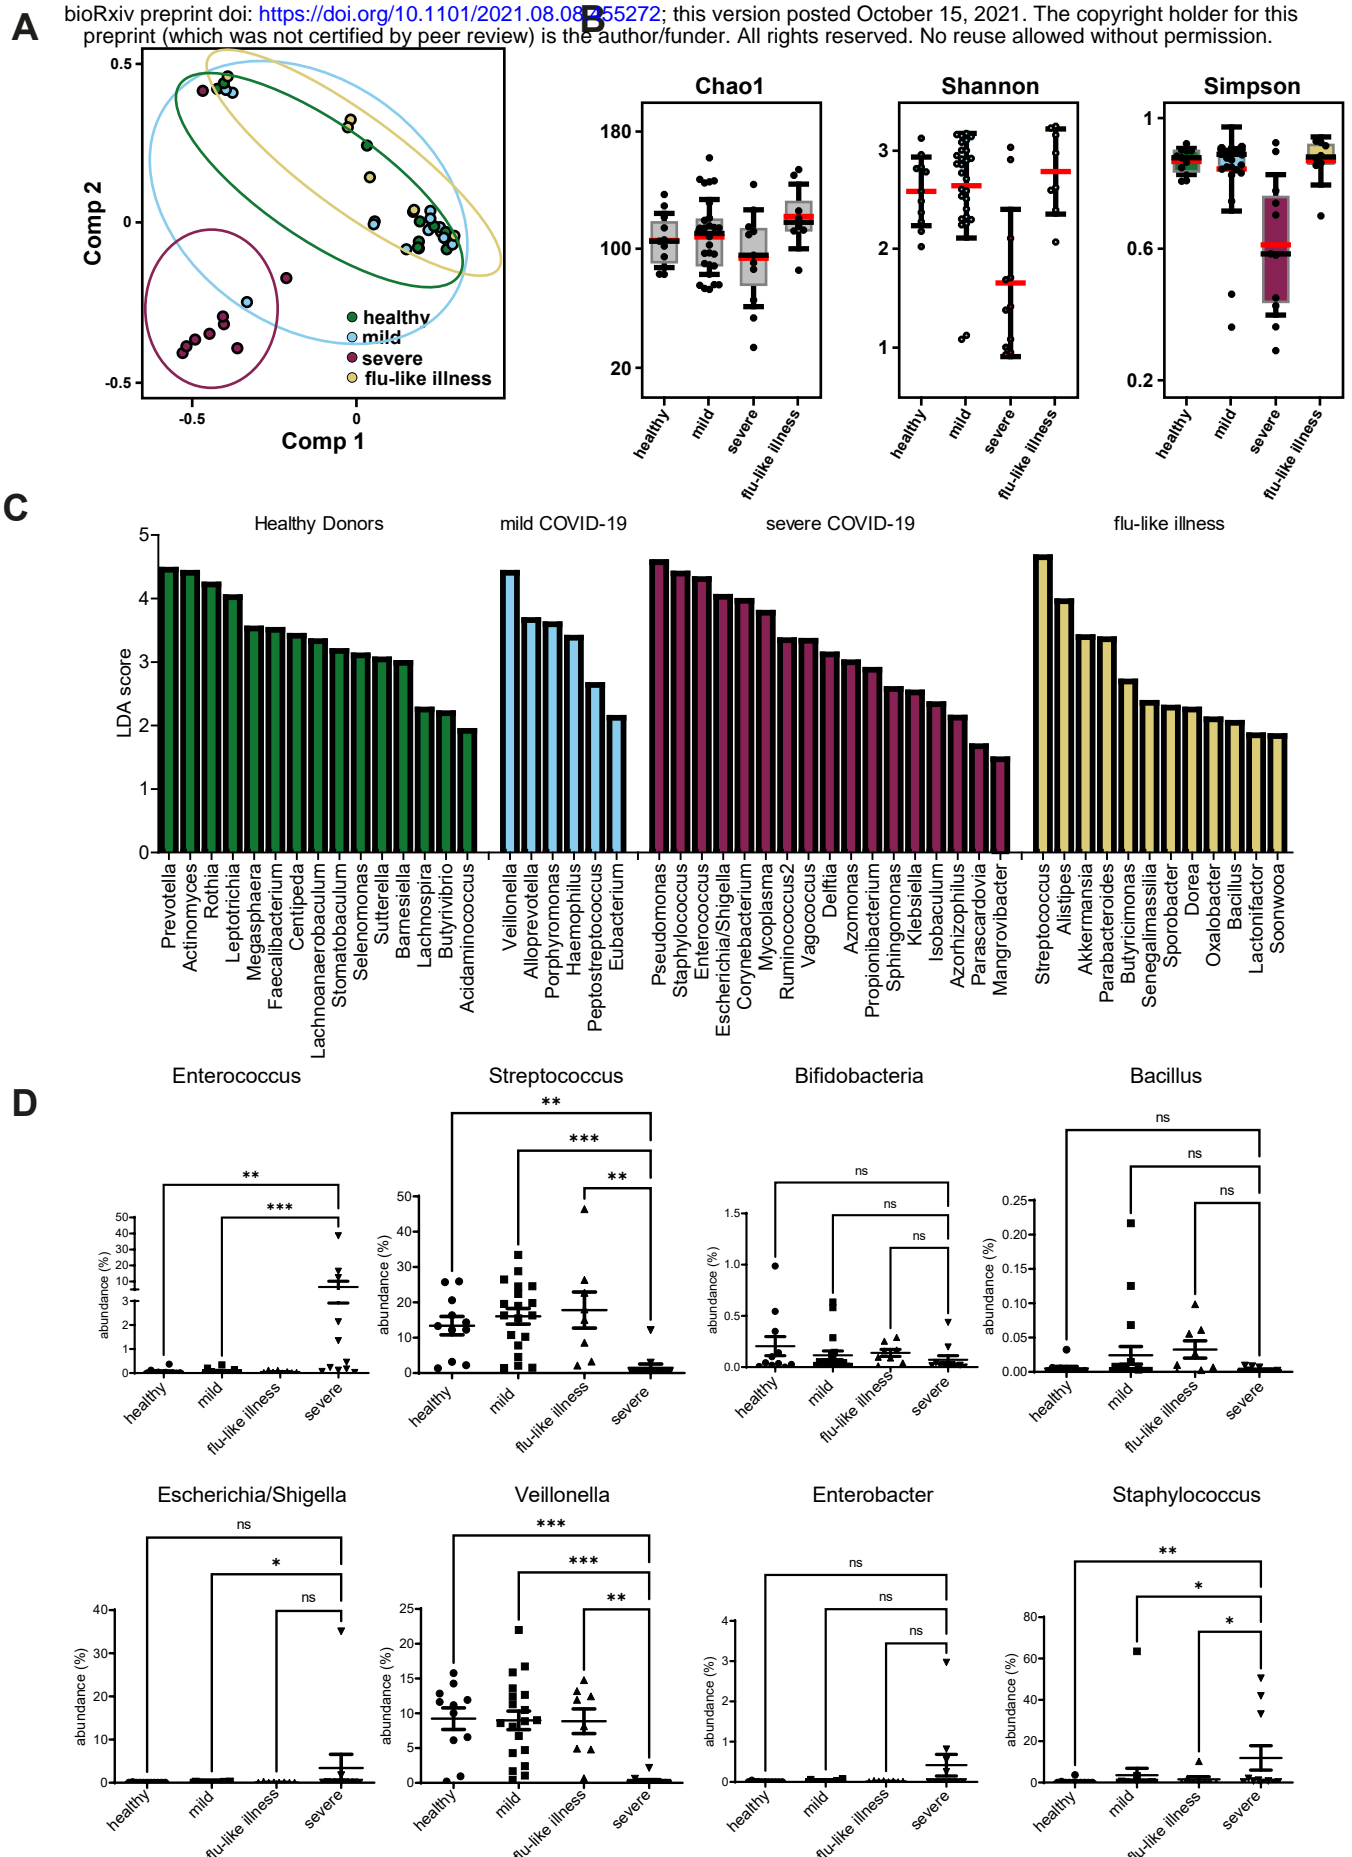

**Fig. 4. Oral microbiota changes during COVID-19.** (A) Principal Component analysis of microbiota of swabs collected from healthy individuals, mild, and severe COVID-19 patients and patients with flu-like illness.

(B) Species richness (Chao1 index) and microbial diversity (Shannon and Simpson index) in oral microbiota collected by swabbing of healthy, mild and severe COVID-19 patients and patients with flu-like illness.

(C) LDA scores of genera between healthy, mild and severe COVID-19 and flu-like illness. Linear discriminant analysis (LDA) combined with effect size measurements (LEfSe) was performed for 16S rRNA datasets obtained from swabs of healthy, mild and severe COVID-19 and flu-like illness. A p-value of  $< 0.05$  was considered significant in Kruskal–Wallis test and were depicted on the figure. (D) Abundance of selected bacterial genera in swabs from healthy, mild and severe COVID-19 and flu-like illness. Kruskal–Wallis test with Dunn’s multiple comparisons was used for (D) unpaired t-test was used for (B).

\*,  $p < 0.05$ , \*\*,  $p < 0.01$ , \*\*\*,  $p < 0.001$ , ns, not significant.
